# Supplementary material for: Hyperspectral Imaging of Head and Neck Squamous Cell Carcinoma for Cancer Margin Detection in Surgical Specimens from 102 Patients Using Deep Learning
Source: Cancers (Basel). 2019 Sep 14;11(9):1367. doi: 10.3390/cancers11091367 (PMC6769839; doi:10.3390/cancers11091367)
Supplement: Supplementary file 1 [file cancers-11-01367-s001.pdf]

## Supplementary Materials

# Hyperspectral Imaging of Head and Neck Squamous Cell Carcinoma for Cancer Margin Detection in Surgical Specimens from 102 Patients Using Deep Learning

Martin Halicek, James D. Dormer, James V. Little, Amy Y. Chen, Larry Myers, Baran D. Sumer and Baowei Fei

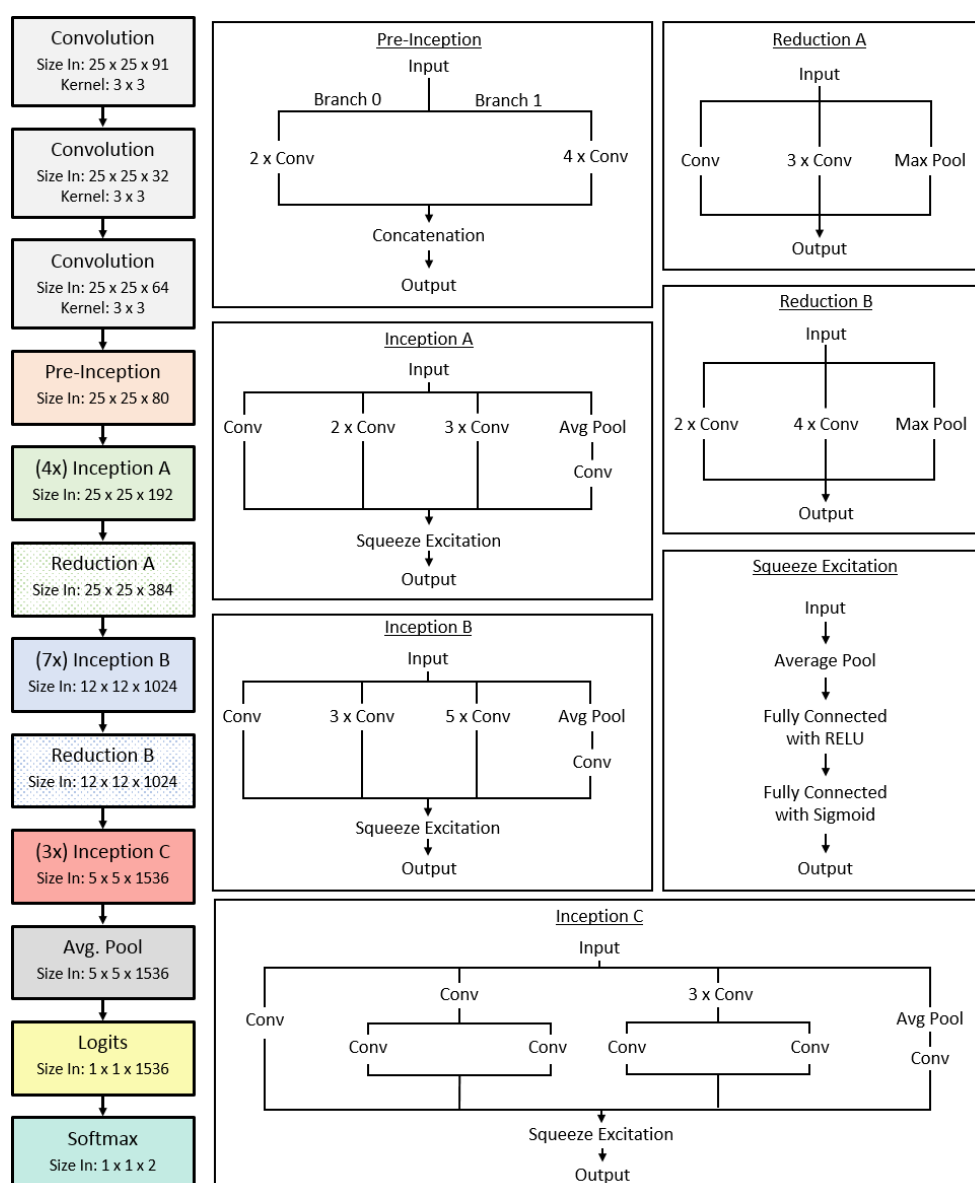

**Figure S1.** Inception V4 CNN architecture (Szegedy, 2016: Inception-v4, Inception-ResNet and the Impact of Residual Connections on Learning) with squeeze-and-excitation layers (Hu 2017: Squeeze-and-Excitation Networks) after each inception block utilizing in this work. “Same” padding was used in all layers except for the Reduction Blocks, which used “valid” padding. The early convolution layers were modified from the traditional inception V4 architecture to account for the hyperspectral nature of the data used.

|                        |          | Surgical Path Prediction |     |     |       |
|------------------------|----------|--------------------------|-----|-----|-------|
|                        |          | T                        | TN  | N   | Total |
| Histology Ground Truth | T        | 59                       | 2   | 0   | 61    |
|                        | TN       | 37                       | 94  | 8   | 139   |
|                        | N        | 2                        | 3   | 88  | 93    |
|                        | Total    | 98                       | 99  | 96  | 293   |
|                        | Accuracy | 60%                      | 95% | 92% | 82%   |

(a)

|                        |       | Surgical Path Prediction |          |       |            |
|------------------------|-------|--------------------------|----------|-------|------------|
|                        |       | T                        | N        | Total |            |
| Histology Ground Truth | T     | 192                      | 10       | 202   | Sens.: 95% |
|                        | N     | 42                       | 193      | 235   | Spec.: 82% |
|                        | Total | 234                      | 203      | 437   |            |
|                        |       | PPV: 82%                 | NPV: 95% |       | Acc.: 88%  |

(b)

**Table S1.** Performance results from the best label-free HSI methods from the inter-patient experiments for each patient cohort by distance from margin (shown with  $\pm$  SEM). In the conventional SCC cohort, reflectance-based HSI is presented. Additionally, the HSI results are separated by anatomical location. For the HPV+ SCC cohort, autofluorescence is presented, which all came from the pharynx.

| Cohort / Method              | Median AUC | Average AUC      | Accuracy      | Sensitivity   | Specificity   |
|------------------------------|------------|------------------|---------------|---------------|---------------|
| <b>Conventional SCC</b>      |            |                  |               |               |               |
| <b>Reflectance-based HSI</b> |            |                  |               |               |               |
| TN Actual                    | 0.75       | $0.68 \pm 0.02$  | $60 \pm 2\%$  | $60 \pm 4\%$  | $54 \pm 3\%$  |
| TN 1mm                       | 0.81       | $0.73 \pm 0.02$  | $66 \pm 2\%$  | $60 \pm 4\%$  | $61 \pm 4\%$  |
| TN 2 mm                      | 0.85       | $0.77 \pm 0.03$  | $64 \pm 3\%$  | $65 \pm 4\%$  | $59 \pm 5\%$  |
| <b>Conventional SCC</b>      |            |                  |               |               |               |
| <b>Reflectance-based HSI</b> |            |                  |               |               |               |
| Oral Cavity, TN 2mm          | 0.81       | $0.79 \pm 0.04$  | $63 \pm 5\%$  | $71 \pm 8\%$  | $49 \pm 8\%$  |
| Tongue, TN 2mm               | 0.78       | $0.64 \pm 0.07$  | $61 \pm 7\%$  | $57 \pm 9\%$  | $53 \pm 9\%$  |
| Nasal Cavity, TN 2mm         | 0.98       | $0.93 \pm 0.06$  | $79 \pm 11\%$ | $69 \pm 17\%$ | $73 \pm 24\%$ |
| Max. Sinus, TN 2mm           | 0.95       | $0.78 \pm 0.18$  | $58 \pm 19\%$ | $93 \pm 5\%$  | $52 \pm 18\%$ |
| Larynx, TN 2mm               | 0.86       | $0.85 \pm 0.05$  | $79 \pm 5\%$  | $69 \pm 11\%$ | $71 \pm 9\%$  |
| Hypopharynx, TN 2mm          | 0.84       | $0.78 \pm 0.13$  | $42 \pm 9\%$  | $20 \pm 14\%$ | $99 \pm 1\%$  |
| Oropharynx, TN 2mm           | 0.95       | $0.95 \pm 0.001$ | $95 \pm 4\%$  | $49 \pm 49\%$ | $78 \pm 22\%$ |
| <b>HPV+ SCC</b>              |            |                  |               |               |               |
| <b>Autofluorescence</b>      |            |                  |               |               |               |
| TN Actual                    | 0.63       | $0.55 \pm 0.05$  | $60 \pm 4\%$  | $45 \pm 6\%$  | $65 \pm 6\%$  |
| TN 1mm                       | 0.63       | $0.56 \pm 0.07$  | $65 \pm 5\%$  | $49 \pm 8\%$  | $62 \pm 8\%$  |
| TN 2 mm                      | 0.77       | $0.68 \pm 0.09$  | $63 \pm 7\%$  | $64 \pm 8\%$  | $60 \pm 9\%$  |

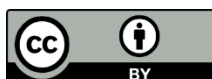

© 2019 by the authors. Licensee MDPI, Basel, Switzerland. This article is an open access article distributed under the terms and conditions of the Creative Commons Attribution (CC BY) license (<http://creativecommons.org/licenses/by/4.0/>).
